# Supplementary material for: Physalin A, 13,14-Seco-16, 24-Cyclo-Steroid, Inhibits Stemness of Breast Cancer Cells by Regulation of Hedgehog Signaling Pathway and Yes-Associated Protein 1 (YAP1)
Source: MDPI journal article supplement (doi:10.3390/ijms22168718), 2021-08-13
Supplement: s1 [file s1]

## Supplementary materials

**Table S1.** Specific Real-time RT-qPCR primer sequences containing *Nanog*, *CD44*, *Oct4*, *c-myc*, *Sox2*, *GLI1*, *YAP1*, and  $\beta$ -actin genes.

| Genes          | Primers                                                                          |
|----------------|----------------------------------------------------------------------------------|
| Nanog          | Forward: 5'-ATGCCTCACACGGAGACTGT-3'<br>Reverse: 5'-AAGTGGGTTGTTGCCTTTG-3'        |
| CD44           | Forward: 5'-AGAAGGTGTGGGCAGAAGAA-3'<br>Reverse: 5'-AAATGCACCATTTCCTGAGA-3'       |
| Oct4           | Forward: 5'-AGCAAAACCCGGAGGAGT-3'<br>Reverse: 5'-CCACATCGGCCTGTGTATATC-3'        |
| c-myc          | Forward: 5'-AATGAAAAGGCCCCCAAGGTAGTTATCC-3'<br>Reverse: 5'-AGCAAAACCCGGAGGAGT-3' |
| Sox2           | Forward: 5'-TTGCTGCCTCTTTAAGACTAGGA-3'<br>Reverse: 5'-CTGGGGCTCAAACCTCTCTC-3'    |
| GLI1           | Forward: 5'-CAGGGAAGAGAGCAGACTGAC-3'<br>Reverse: 5'-CAGGAGGATTGTGCTCCA-3'        |
| YAP1           | Forward: 5'-GAACCCCAGATGACTTCCTG-3'<br>Reverse: 5'-CTCCTTCCAGTGTTCCAAGG-3'       |
| $\beta$ -actin | Forward: 5'-TGTTACCAACTGGGACGACA-3'<br>Reverse: 5'-GGGGTGTGAAGGTCTCAAA-3'        |

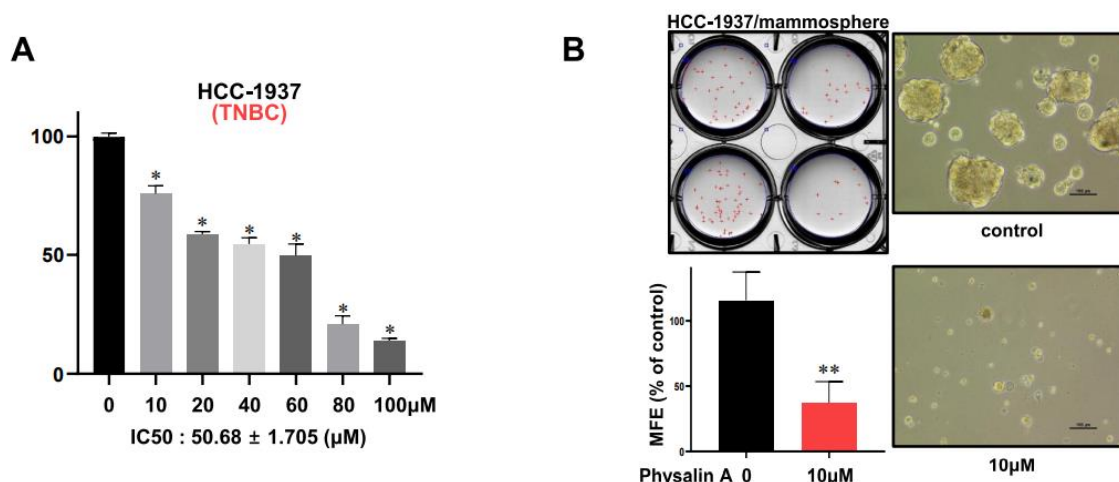

**Figure S1.** Physalin A inhibits breast cancer cell viability and mammosphere formation efficiency. **(A)** Breast cancer cell line, HCC-1937 (TNBC), was cultured with increasing concentration of physalin A (0, 10, 20, 40, 60, 80, 100  $\mu$ M) for 24 h. The cytotoxic effect of physalin A was measured using the MTS assay. **(B)** Physalin A inhibits mammosphere-forming ability. HCC-1937 cells ( $4 \times 10^4$  per well) was cultured in 6-well ultralow attachment plates with/without physalin A. Representative mammospheres in the photos were captured by inverted light microscopy (scale bar: 100  $\mu$ m). The mammosphere formation efficiency (MFE) was determined as shown in the graph. Mean  $\pm$  SD values from three independent experiments are presented. \* $p < 0.05$ , \*\* $p < 0.01$ .

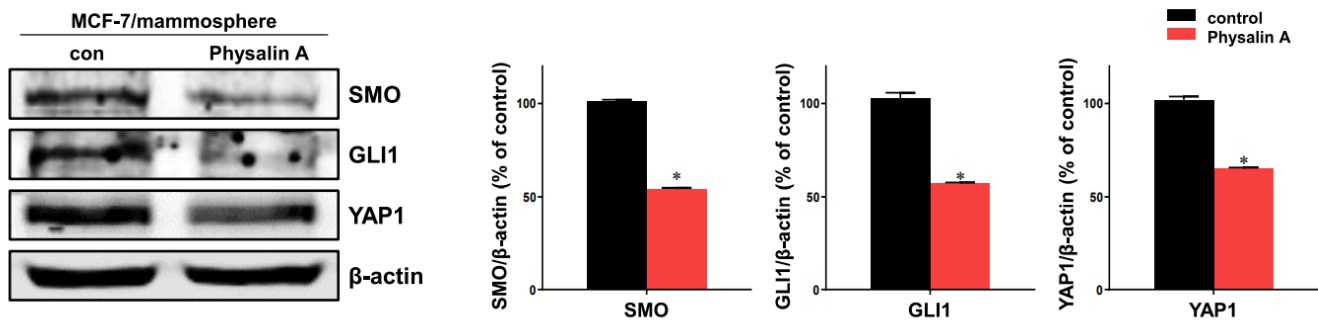

**Figure S2.** Effect of physalin A on Hedgehog and Hippo signaling pathway of MCF-7 cell line. Physalin A decreased the total protein level of SMO, GLI1, and YAP1 in breast mammospheres. Anti-SMO, anti-GLI1, and anti-GLI1 YAP1 antibody were used for immunoblotting. β-actin was used as the internal control. Western blot images of triplicate experiments are shown as mean ± SD. \* $p < 0.05$  vs. DMSO-treated control.
